# Supplementary material for: A long-term dataset on hydrology and suspended sediments in the Kamech catchment from the OMERE Observatory
Source: Copernicus journal article supplement (doi:10.5194/essd-2025-704), 2025-12-03
Supplement: Supplementary file [file essd-2025-704-AC1-supplement.pdf]

The referee's comment is in black, and our response is in blue.

## Response to comment by reviewer 1

Thanks a lot for this very interesting paper / database.

It addresses a relevant research and data gap. The scientific quality is very good and, for sure, adequate for ESSD.

Thanks for this general positive comment.

Generally speaking, I think the database should also include the geographic data in GIS format over the area, at least the ones used for generating Table 1, to allow an integrated use/analysis of the database.

As requested, we have added the geodata corresponding to the drainage area of each of the four hydrometric stations mentioned in this paper (i.e. PAR, MBV, GBV and LAKE). We have also added to Section 6, 'Data Availability', that supplementary metadata and data, such as geodata or meteorological data, can be obtained via the OMERE observatory, in particular via its website <http://www.omere.org>.

Minor comments:

Lines 56-57 "By analyzing the response of eight small Mediterranean catchments across different environments, Smetanová et al. (2018)..." The cited paper refers to seven catchments in the North Mediterranean and only one (which is the one in the present study) in the South Mediterranean. Please extend the literature review to more sources to other similar studies in the South Med region.

This comment echoes a point made by Reviewer 2, who suggested modifying this paragraph to better highlight the originality of our dataset. We have therefore completely revised this paragraph, providing a brief review of the literature on rainfall, runoff and erosion datasets in the Mediterranean region. This helps us emphasise the added value of our dataset, which covers an 18-year period from the severely underrepresented southern Mediterranean region.

Line 84, Figure 1. It is not clear if the LAKE boundary extends over the GBV area. Please consider a double line or a clearer symbology. I would include also the altimetry (DEM) of the area.

Thanks. The requested changes have been done.

Line 111, Figure 2. Not sure if the images can have a Copyright if the publication is CC-BY

The copyright has been removed.

Line 122, Table 1. Insert the area of the lake for the LAKE catchment

Done

Line 186. Insert "3.1"

Done

Line 270. You could include the equation of the curve and how it was created.

In the revised version of the paper, we have provided further details on how the rating lookup table was compiled. Furthermore, as requested by reviewer no. 2, we have shared a new time series (titled 'LAKE\_Vol') showing the volume of water flowing out of the reservoir via the spillway and/or the bottom gate. This gives users of the shared dataset direct access to this information, so they don't have to recalculate it.

## Response to reviewer 2

The data paper by Hamdi et al present hydro-sedimentary observations of the Kamech catchment, Tunisia.

Considering the challenges of maintaining such an observatory yielding time series of 18 years (some longer), these data definitely merit publication.

The authors take great effort in documenting and quantifying data sources and quality. Some of the used criteria (necessarily) remain slightly fuzzy and categorical. I annotated the text where this could be improved.

The literature review needs to be enhance. By pointing at similar data sources. the uniqueness of the presented data should be highlighted.

Furthermore, detail on some technical aspects of measurements need to be supplied.

We would like to thank reviewer 2 for providing such detailed comments and constructive suggestions in the annotated PDF. These have greatly improved the paper. All of these have been given careful consideration, including enhancing the literature review and providing additional aspects of measurement, as suggested.

Conversely, the included presentation of the data could be condensed. Namely, considering the absence of any trends in most aspects analyzed, and regarding the prevalence for class-2-error in these multiple tests, I consider omitting this section altogether for the sake of conciseness. It is not necessary for the data paper and does not yield substantial information.

As suggested, we have removed the entire Section 4.3. We have also updated the conclusion to reflect this change.

Concerning the data itself, the file structure is coherent and logical. Add section on data formats and conventions (e.g. used file formats, date format, separators, etc.) as a section to the manuscript and/or reference and supplement the readme file in the repository.

Further information on data formats, units and conventions has been added to the 'Readme.txt' file in the shared repository. We have also added a few sentences to section 6 ('Data Availability') of the main revised version to provide the main guiding principles and mention the existence of the 'Readme.txt' file.

Given the potential value of the dataset also for hydrological and sediment modelling, the potential user would require additional data (e.g. radiation, geodata on soil and vegetation, etc.). Where available, the authors would increase the impact of the dataset by adding these data (e.g. shape file of landuse, DEM, bathymetries) or at least pointing to third party data sources where such data could be obtained (e.g. nearest national meteo station).

As already mentioned in a response to reviewer 1 : “We have added the geodata corresponding to the drainage area of each of the four hydrometric stations mentioned in this paper (i.e. PAR, MBV, GBV and LAKE). We have also added to Section 6, ‘Data Availability’, that supplementary metadata and data, such as geodata or meteorological data, can be obtained via the OMERE observatory, in particular via its website <http://www.omere.org>”.

The manuscript is well written. I indicated a few suggestions for conciseness and wording.

The included figures are useful, but require some reworking.

Done

I recommend moderate revisions.

Please see details in annotated PDF.

Once again, we really appreciate you sending the details in PDF format. Our final, revised version takes all of the points you raised into account. You can check this in the version of the paper with tracked changes.
